# Supplementary material for: Induction of self-structure in polyriboadenylic acid by the benzophenanthridine plant alkaloid chelerythrine: a spectroscopic approach
Source: Royal Society of Chemistry journal article supplement (doi:10.1039/c4ra07075e), 2014-01-01
Supplement: c4ra07075e1.pdf [file c4ra07075e1.pdf]

## Supplementary Information

Induction of self-structure in polyriboadenylic acid by the  
benzophenanthridine plant alkaloid chelerythrine: A spectroscopic  
approach

Ankur Bikash Pradhan<sup>§</sup>, Lucy Haque<sup>§</sup>, Sutanwi Bhuiya and Suman Das\*

**Table S1** Summary of the optical properties of free and poly-A bound CHL<sup>a</sup>

| <b>Absorbance</b>                                                                         |             |
|-------------------------------------------------------------------------------------------|-------------|
| $\lambda_{\text{max, free}}$ (nm)                                                         | 316         |
| $\lambda_{\text{max, bound}}$ (nm)                                                        | 321         |
| $\lambda_{\text{iso}}$ (nm)                                                               | 467         |
| $\epsilon_{\text{free}}$ (at $\lambda_{\text{max}}$ , M <sup>-1</sup> cm <sup>-1</sup> )  | 37037 (316) |
| $\epsilon_{\text{bound}}$ (at $\lambda_{\text{max}}$ , M <sup>-1</sup> cm <sup>-1</sup> ) | 19207 (316) |
| * $\epsilon$ (at $\lambda_{\text{iso}}$ , M <sup>-1</sup> cm <sup>-1</sup> )              | 2948 (467)  |
| <b>Fluorescence</b>                                                                       |             |
| $\lambda_{\text{excitation}}$ (nm)                                                        | 400         |
| $\lambda_{\text{max, emission}}$ (nm)                                                     | 564         |
| <sup>#</sup> $F_b/F_o$                                                                    | 11.73       |

\*Wavelength at isosbestic point. <sup>#</sup> F<sub>o</sub> and F<sub>b</sub> are the fluorescence intensities of the free and completely bound CHL respectively at 564 nm.

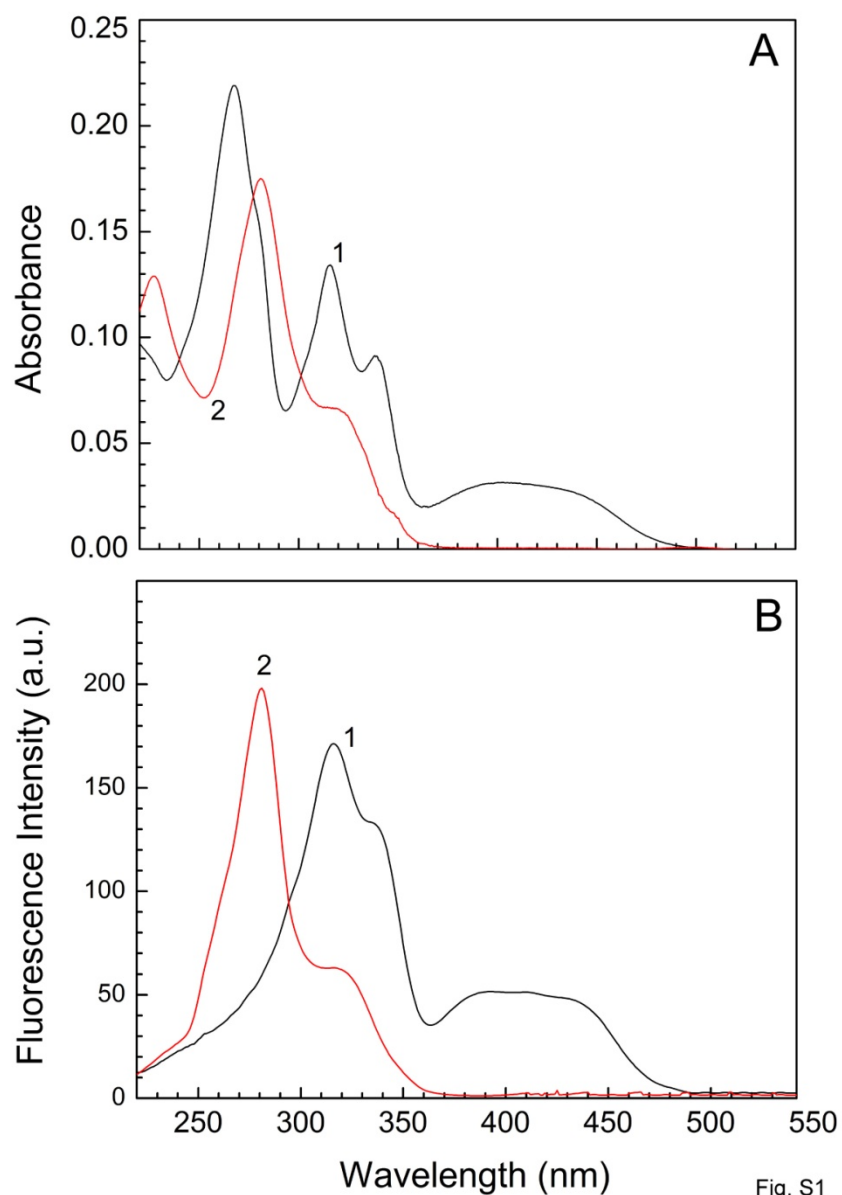

Fig. S1

**Fig. S1.** Absorption (Panel A) and fluorescence excitation (Panel B) spectra of iminium (curve 1) and alkanolamine (curve 2) form of CHL (2.56  $\mu\text{M}$ ) at 25  $^{\circ}\text{C}$ . Spectrum of iminium form was taken in CPB buffer (pH 6.5) and spectrum of alkanolamine form was taken in 10 mM carbonate-bicarbonate buffer containing 25 mM NaCl (pH 10.1). Excitation and emission bandwidth were 5 and 5 nm, respectively.

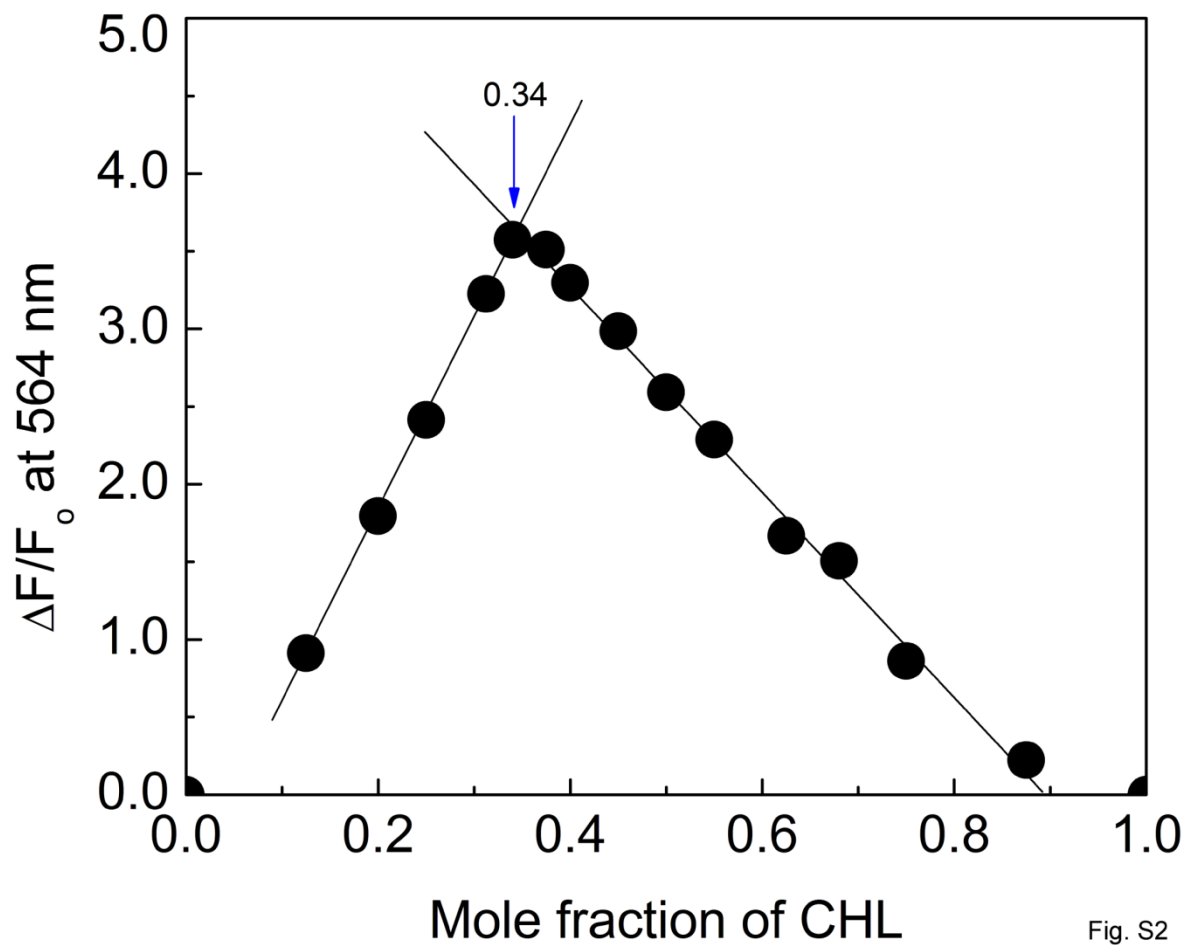

**Fig. S2.** Job's plot for the binding of CHL poly-A in CPB buffer at 25 °C. The relative difference in fluorescence intensity at 564 nm was plotted against the mole fraction of CHL added.

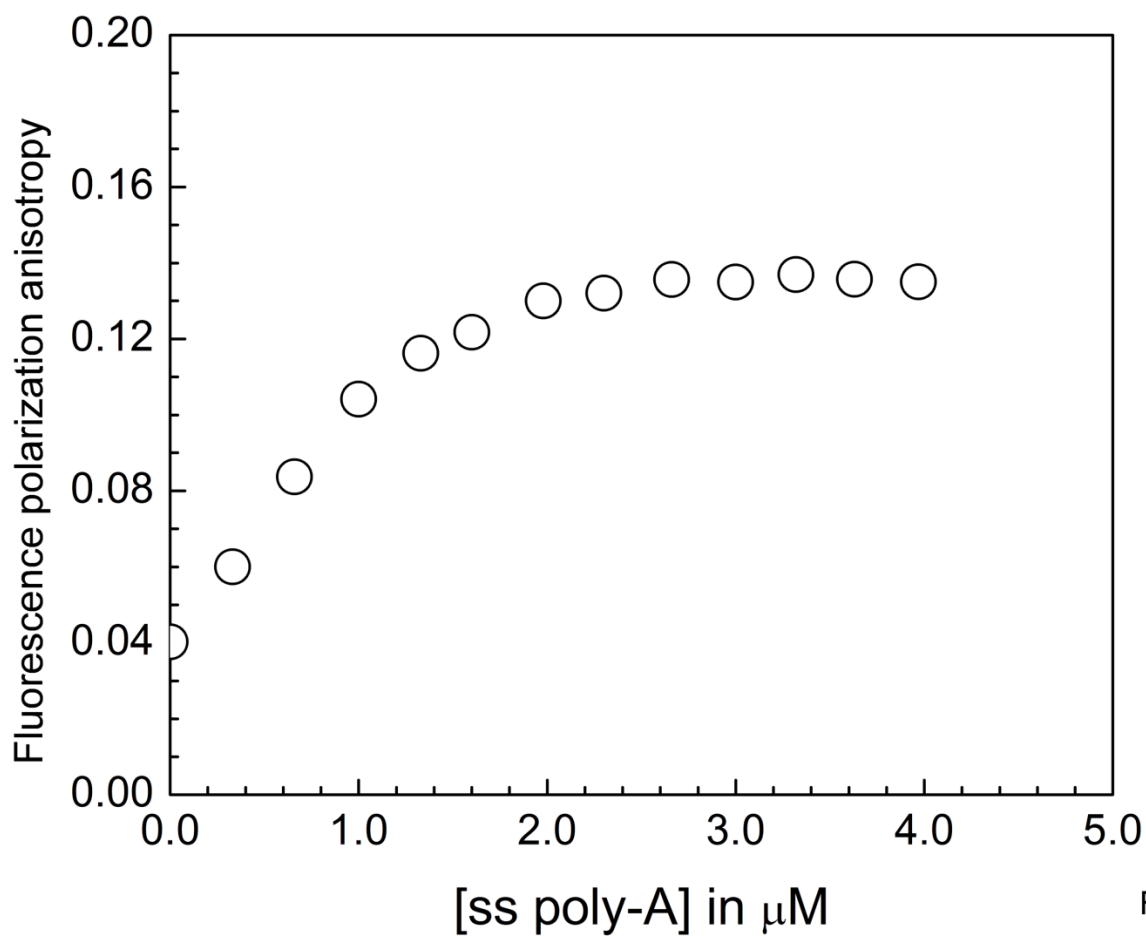

Fig. S3

**Fig. S3.** Variation of the anisotropy of CHL fluorescence as a function of concentration of poly-A.  $\lambda_{\text{ex}}$  and  $\lambda_{\text{em}}$  for CHL was 400 nm and 564 nm respectively.

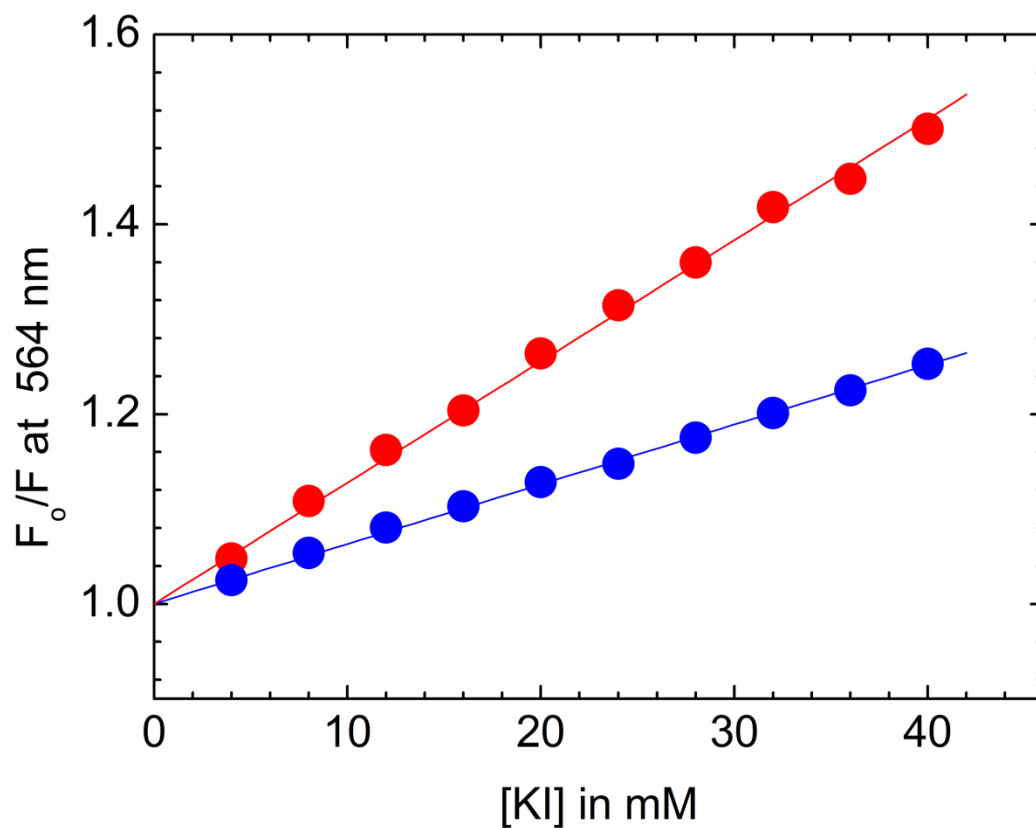

Fig. S4

**Fig. S4.** Stern-Volmer plots for the quenching of CHL fluorescence by KI in the absence (●) and in presence (●) of poly-A in CPB buffer at 25 °C.

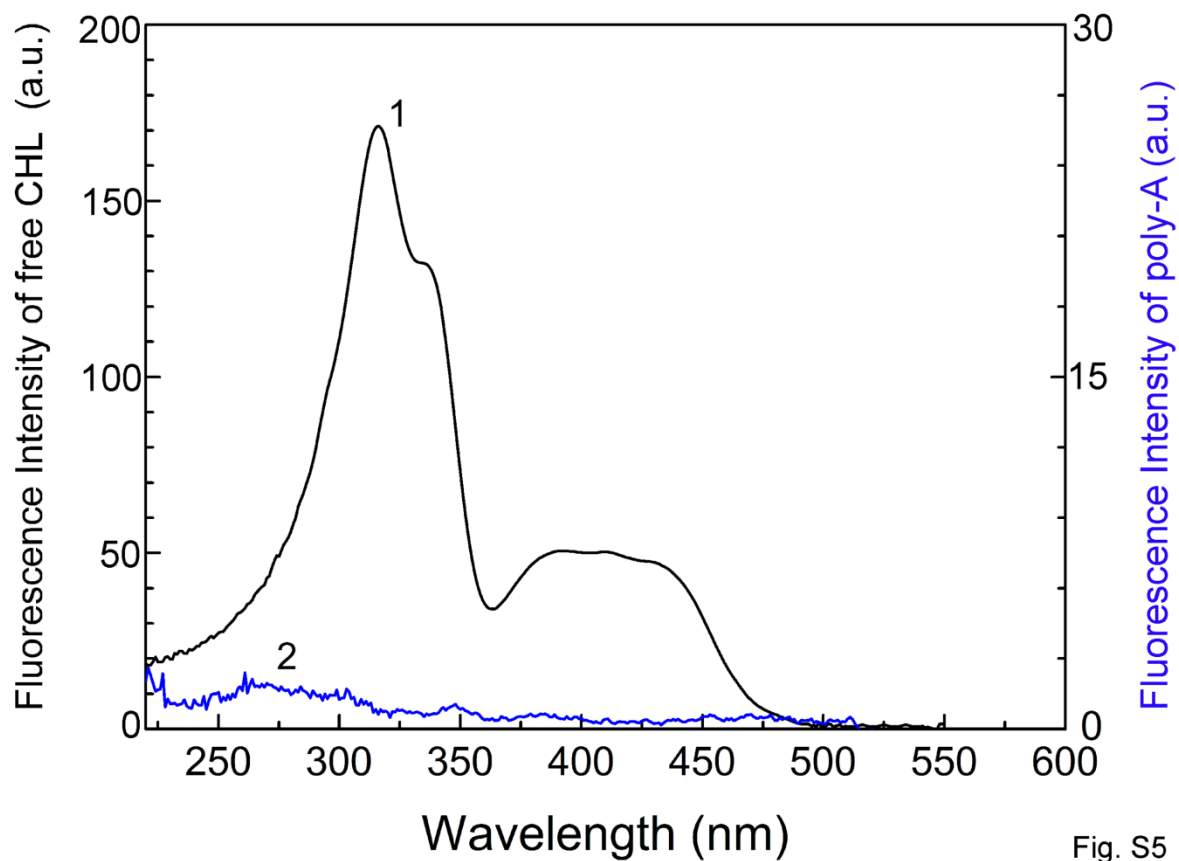

Fig. S5

**Fig. S5.** Fluorescence excitation spectra of free CHL (2.56  $\mu\text{M}$ , curve 1) and poly-A (25.6  $\mu\text{M}$ , curve 2) in CPB buffer at 25  $^{\circ}\text{C}$ . Excitation and emission bandwidth were fixed at 5 and 5 nm respectively.
